# Supplementary material for: Knowledge about preventive dentistry versus self-reported competence in providing preventive oral healthcare – a study among Nepalese dentists
Source: Springer Nature journal article supplement (doi:10.1186/s12903-017-0366-5), 2017-04-12

## DENTISTS' QUESTIONNAIRE

### Personal data

---

- (1) Year of birth \_\_\_\_\_
- (2) Gender
- 1  Female
- 2  Male
- (3) Year of graduating from dental school \_\_\_\_\_
- (4) How long have you been working as a dentist \_\_\_\_\_
- (5) Where did you complete your basic degree as a dentist?
- 1  In Nepal
- 2  Abroad (Specify) \_\_\_\_\_
- (6) Current job(s)  
(You can tick more than one answer)
- 1  Self employed dentist in private clinic
- 2  Employed dentist in private clinic
- 3  Dentist in public clinic
- 4  Dentist or specialist in hospital or dental centre
- 5  No clinical work presently
- (7) Field of practice \_\_\_\_\_
- (8) Patient group you presently work with  
(Please tick one only)
- 1  General dentist
- 2  Children (0-14 yrs.)
- 3  Restorative/conservative dentistry
- 4  Adults
- 5  Prosthodontic dentistry
- 6  Mixed
- 7  Orthodontic dentistry
- 8  Oral surgeon
- 9  Paedodontic dentist
- 10  Periodontic dentistry

### Oral hygiene and dietary behaviour and utilization of dental services

---

- (9) How often do you usually brush your teeth?  
(Please tick one only)
- 1  Once daily
- 2  Twice daily
- 3  Thrice daily
- 4  Once a week
- (10) How often do you clean the space between the teeth?  
(Please tick one only)
- 1  Not every day
- 2  Once a day
- 3  Twice a day
- 4  After every meal
- 5  Never
- (11) At what time do you primarily clean your teeth?  
(You can tick more than one answer)
- 1  In the morning (without breakfast)
- 2  After breakfast
- 3  Usually before meals
- 4  Usually after meals
- 5  When going out
- 6  Before going to bed
- 7  Other times, (please specify) when  
.....
- (12) Do you use toothpaste containing fluoride while brushing?
- 1  Always or almost always
- 2  Quite often
- 3  Seldom
- 4  Not at all
- 5  I use something else (please specify)  
.....

(13) How often do you take meals during a day?

- 1  One time
- 2  Two times
- 3  Three times
- 4  Four times
- 5  Five times or more

(14) How often do you eat sugar-containing snacks between your main meals?

- 1  About 3 times a day or more
- 2  About twice a day
- 3  About once a day
- 4  Occasionally; not every day
- 5  Rarely or never eat between meals

(15) How often do you eat sugar-containing coffee between your main meals?

- 1  About 3 times a day or more
- 2  About twice a day
- 3  About once a day
- 4  Occasionally; not every day
- 5  Rarely or never drink between meals

(16) How often do you eat sugar-containing tea between your main meals?

- 1  About 3 times a day or more
- 2  About twice a day
- 3  About once a day
- 4  Occasionally; not every day
- 5  Rarely or never drink between meals

(17) About how long ago was your most recently dental treatment?

- 1  No more than 6 month ago
- 2  More than 6 month up to 1 year ago
- 3  More than 1 up to 2 years ago
- 4  More than 2 years up to 5 years ago
- 5  More than 10 years ago
- 7  Never

(18) What was the reason for this visit?

- 1  I had trouble with my teeth/gums
- 2  For regular check-up
- 3  Other, please specify the reason

(19) How would you describe the condition of your mouth and teeth?

- 1  Good
- 2  Quite good
- 3  Average
- 4  Quite bad
- 5  Bad
- 6  I do not know

(20) In general, are you satisfied or dissatisfied with the appearance of your teeth?

- 1  Satisfied
- 2  Neither/nor
- 3  Dissatisfied

(21) In general are you satisfied or dissatisfied with the function of your teeth?

- 1  Satisfied
- 2  Neither/nor
- 3  Dissatisfied

### Continuing Dental Education

*(This section has one question and two statements to be answered.)*

(22) If you had any learning opportunities during the last 2 years (2004-2005), in which field of dentistry, how many times, and how long did they take? Please tick whether you had any need for a continuing education course on these subjects regardless of whether you have taken a course on it during the last 2 years.

| Fields | How many times? |
|--------|-----------------|
|--------|-----------------|

- 1 Restorative
- 2 Prosthodontics
- 3 Oral surgery
- 4 Prevention
- 5 Pedodontics
- 6 Orthodontics

| How many days in total<br>(estimated as working days) |
|-------------------------------------------------------|
|-------------------------------------------------------|

- 1 Restorative
- 2 Prosthodontics
- 3 Oral surgery
- 4 Prevention
- 5 Pedodontics
- 6 Orthodontics

Have you had need for any more courses?

|                  | yes                        | no                         |
|------------------|----------------------------|----------------------------|
| 1 Restorative    | 1 <input type="checkbox"/> | 2 <input type="checkbox"/> |
| 2 Prosthodontics | 1 <input type="checkbox"/> | 2 <input type="checkbox"/> |
| 3 Oral surgery   | 1 <input type="checkbox"/> | 2 <input type="checkbox"/> |
| 4 Prevention     | 1 <input type="checkbox"/> | 2 <input type="checkbox"/> |
| 5 Pedodontics    | 1 <input type="checkbox"/> | 2 <input type="checkbox"/> |
| 6 Orthodontics   | 1 <input type="checkbox"/> | 2 <input type="checkbox"/> |

*How do you agree to the following statements?*

(23) Continuing education courses would be of great use for dentists

- 1  Strongly agree
- 2  Agree
- 3  Disagree
- 4  Strongly disagree
- 5  Don't know

(24) Continuing education should be compulsory for dentists

- 1  Strongly agree
- 2  Agree
- 3  Disagree
- 4  Strongly disagree
- 5  Don't know

### Competency and orientation in preventive care

*(Please tick one answer that mostly reflects your view.)*

(25) In your opinion, having good teeth depends on:

- 1  By chance
- 2  Hereditary factors
- 3  Taking good dental care
- 4  Both (2+3)
- 5  I do not know

(27) How competent do you feel in giving preventive treatment to patients?

- 1  Very
- 2  Quite
- 3  Not very
- 4  Not at all

(28) How competent do you feel in giving oral health education to patients?

- 1  Very
- 2  Quite
- 3  Not very
- 4  Not at all

*How do you agree to the following statement?*

(29) Training on and practice of preventive dentistry both in dental undergraduate education and in clinical dental practice should be increased

- 1  Strongly agree
- 2  Agree
- 3  Disagree
- 4  Strongly disagree
- 5  Don't know

### Preventive knowledge

---

(30) Brushing teeth with fluoride toothpaste prevent tooth decay

- 1  Strongly agree
- 2  Agree
- 3  Disagree
- 4  Strongly disagree
- 5  Don't know

(31) Using fluoride toothpaste is more important than the brushing technique to prevent caries

- 1  Strongly agree
- 2  Agree
- 3  Disagree
- 4  Strongly disagree
- 5  Don't know

(32) Fluoride is the most important factor for tooth susceptibility to decay

- 1  Strongly agree
- 2  Agree
- 3  Disagree
- 4  Strongly disagree
- 5  Don't know

(33) Fluoridation of the drinking water is an effective, safe, and efficient way to prevent dental caries

- 1  Strongly agree
- 2  Agree
- 3  Disagree
- 4  Strongly disagree
- 5  Don't know

(34) It is beneficial to recommend fluoride tablets and/or topical fluorides for children in areas without a fluoridated water supply

- 1  Strongly agree
- 2  Agree
- 3  Disagree
- 4  Strongly disagree
- 5  Don't know

(35) The frequency of sugar-consumption has a greater role than the total amount of sugar consumed in causing caries

- 1  Strongly agree
- 2  Agree
- 3  Disagree
- 4  Strongly disagree
- 5  Don't know

(36) Sugar-free chewing gum has a positive effect on dental health

- 1  Strongly agree
- 2  Agree
- 3  Disagree
- 4  Strongly disagree
- 5  Don't know

(37) Xylitol is not only non-cariogenic, but also suppresses the growth of acidogenic bacteria in dental plaque

- 1  Strongly agree
- 2  Agree
- 3  Disagree
- 4  Strongly disagree
- 5  Don't know

(38) Sealant is effective in prevention of pit and fissure caries in molars

- 1  Strongly agree
- 2  Agree
- 3  Disagree
- 4  Strongly disagree
- 5  Don't know

(39) It is beneficial to visit a dentist for regular check-ups

- 1  Strongly agree
- 2  Agree
- 3  Disagree
- 4  Strongly disagree
- 5  Don't know

(40) Regular brushing helps in prevention of gum problems

- 1  Strongly agree
- 2  Agree
- 3  Disagree
- 4  Strongly disagree
- 5  Don't know

(41) Gingivitis is caused by dental plaque

- 1  Strongly agree
- 2  Agree
- 3  Disagree
- 4  Strongly disagree
- 5  Don't know

(42) Gingivitis can be cured by effective oral hygiene

- 1  Strongly agree
- 2  Agree
- 3  Disagree
- 4  Strongly disagree
- 5  Don't know

(43) Having dental problems can lead to general health problems

- 1  Strongly agree
- 2  Agree
- 3  Disagree
- 4  Strongly disagree
- 5  Don't know

## General questions

---

(44) Is maintaining teeth important to you?

- 1  Very important
- 2  Quite important
- 3  Average
- 4  It is not important
- 5  I do not care

(45) What do you use to clean the space between the teeth?

- 1  Toothpick
- 2  Dental floss
- 3  Interdent brush
- 4  Nothing

(46) Where did you have dental treatment? (If have any) *Please tick one only*

- 1  Hospital
- 2  own clinic
- 3  Private dental clinic

(47) If you have not had dental treatment for two years, what is the reason?  
*(You may choose more than one answer)*

- 1  I did not have any problems
- 2  Dental care is unpleasant
- 3  Dental care is too expensive
- 4  I did not have time
- 5  Other reasons (please specify)

.....

(48) Do you currently experience, or have you earlier experienced, gingival bleeding?

- 1  Currently experiencing gingival bleeding
- 2  Earlier experienced gingival bleeding, but not now
- 3  Never had gingival bleeding

(49) Do you currently experience tooth mobility because of periodontal problems?

- 1  No
- 2  Yes

**THANK YOU**

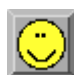

Supplement: MOESM1 [file 12217436]
